# Supplementary material for: A Public Health Issue: Dietary Supplements Promoted for Brain Health and Cognitive Performance
Source: PubMed Central journal article supplement — J Altern Complement Med. 2020 Apr 10;26(4):265–72. doi: 10.1089/acm.2019.0447 (PMC7153641; doi:10.1089/acm.2019.0447), 2020-04-10
Supplement: Supp_Data.pdf [file Supp_Data.pdf]

## Supplementary Data

### Supplementary Data S1. Umbrella Review and Evidence Mapping Exercise to Identify Systematic Review/Meta-analyses: What Already Exists in Terms of Evidence?

PubMed and Cochrane database for systematic reviews (Cochrane Dementia and Cognitive Improvement Group) databases were searched to determine the breadth of systematic review and meta-analysis literature for each of the 72 ingredients yielded from the scoping review. Searches

were conducted throughout the week of 15APR19. Publications from 1993 to 2019 related to dietary supplements and cognitive performance located on the U.S. Army Research Institute of Environmental Medicine website under Military Nutrition were also reviewed.

Two reviewers screened the titles/abstracts yielded from the searches for initial eligibility based on predefined eligibility criteria (Supplementary Table S1). Full-text articles of relevant citations were examined for methodological

SUPPLEMENTARY TABLE S1. ELIGIBILITY CRITERIA FOR *BROAD STRATEGY TO IDENTIFY WHAT ALREADY EXISTS FROM SYSTEMATIC REVIEWS: ARE THERE SPECIFIC DIETARY INGREDIENTS THAT CAN SAFELY BE USED TO EFFECTIVELY ENHANCE BRAIN HEALTH/COGNITIVE PERFORMANCE-RELATED OUTCOMES?*

| <i>Eligibility criteria</i> | <i>Broad eligibility used to examine “what exists”</i>                                                                                                                                                                                                                                                                                                                                                                                                                                                                                                                                                                                                                                                                                                         | <i>Search strategy</i>                                                                                                                                                                                                                                                                                                                                                                                                                                                                          |
|-----------------------------|----------------------------------------------------------------------------------------------------------------------------------------------------------------------------------------------------------------------------------------------------------------------------------------------------------------------------------------------------------------------------------------------------------------------------------------------------------------------------------------------------------------------------------------------------------------------------------------------------------------------------------------------------------------------------------------------------------------------------------------------------------------|-------------------------------------------------------------------------------------------------------------------------------------------------------------------------------------------------------------------------------------------------------------------------------------------------------------------------------------------------------------------------------------------------------------------------------------------------------------------------------------------------|
| Population                  | Any adults (18+ years old), healthy or unhealthy, with any cognitive impairment, including mild cognitive impairment or Alzheimer’s disease, with or without dementia.                                                                                                                                                                                                                                                                                                                                                                                                                                                                                                                                                                                         | No initial restrictions to learn “what exists.”                                                                                                                                                                                                                                                                                                                                                                                                                                                 |
| Intervention                | Any dietary supplement/ingredient defined as any product that met the following criteria: (a) any product (other than tobacco) intended to supplement the diet that contains one or more of the following ingredients: a vitamin, mineral, herb or other botanical, an amino acid, a concentrate, metabolite, constituent, extract, or combination of any of these ingredients; (b) administered in any form (e.g., tablet, capsule, soft gel, gel cap, liquid, powder, gel, chews, inhalant, nasal spray, skin patches/lotions/applications); (c) not represented as conventional food or as a sole item of a meal or of the diet (e.g., sport drinks, shakes, bars); (d) included a “Supplement Facts” rather than “Nutrition Facts” panel. <sup>S1,S2</sup> | Seventy-two prevalent dietary ingredients across products identified.<br>Specific ingredient names coupled with their scientific names and common names were used to create search string.<br><i>Studies were only eligible if they examined the ingredient as an intervention; studies on dietary intake/status or association between levels and disease progression were excluded.</i>                                                                                                       |
| Control/Comparator(s)       | Sham (placebo), no treatment and/or active comparators.                                                                                                                                                                                                                                                                                                                                                                                                                                                                                                                                                                                                                                                                                                        | No restrictions; comparators will be later grouped according to type.                                                                                                                                                                                                                                                                                                                                                                                                                           |
| Outcome(s)                  | Brain health and cognitive performance-related outcomes, e.g., brain function, memory, alertness, concentration, mental health, focus, clarity, recall, energy, cognition, cognitive performance, mental performance, mental decline, cognitive function, brain health.                                                                                                                                                                                                                                                                                                                                                                                                                                                                                        | The authors executed the following search, which includes MeSH strategy, to capture all outcomes:<br><i>(mental processes OR cognitive dysfunction OR “brain health” OR “cognitive health” OR mental health OR “brain function” OR “cognitive function” OR executive function OR “mental clarity” OR “cognitive ability” OR “cognitive performance” OR “mental performance” OR “reaction time OR memory OR problem-solving OR “energy” OR “alert” OR “focus” OR attention OR concentration)</i> |
| Study Design(s)             | The authors will look for evidence first through quality systematic reviews and meta-analyses; if no evidence exists, they will then look for randomized clinical trials; <i>published protocols and previously updated reviews are excluded.</i>                                                                                                                                                                                                                                                                                                                                                                                                                                                                                                              | Search limiters used to target systematic reviews/meta-analyses before moving into other study designs.                                                                                                                                                                                                                                                                                                                                                                                         |
| Timing                      | The authors are interested both in acute and long-term use and performance, initially.                                                                                                                                                                                                                                                                                                                                                                                                                                                                                                                                                                                                                                                                         | No restrictions; later to categorize into different categories of timing.                                                                                                                                                                                                                                                                                                                                                                                                                       |

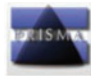

### PRISMA 2009 Flow Diagram

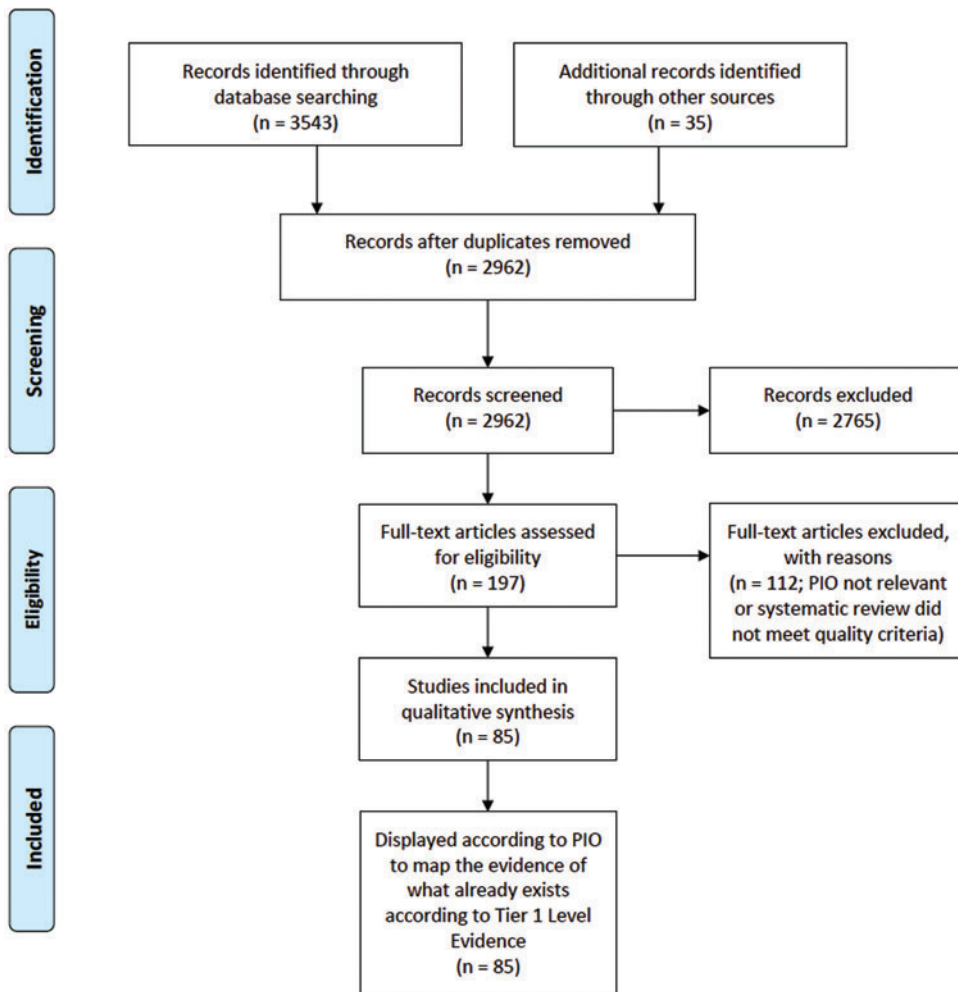

From: Moher D, Liberati A, Tetzlaff J, Altman DG, The PRISMA Group (2009). Preferred Reporting Items for Systematic Reviews and Meta-Analyses: The PRISMA Statement. PLoS Med 6(7): e1000097. doi:10.1371/journal.pmed1000097

For more information, visit [www.prisma-statement.org](http://www.prisma-statement.org).

### SUPPLEMENTARY FIG. S1. Flow chart.

quality (e.g., a transparent search strategy, quality assessment of included studies, and defined eligibility criteria; narrative reviews/expert opinions and studies only examining levels of an ingredient within the body were excluded).

Supplementary Figure S1 displays the flow of citations. Of the 3,578 citations retrieved from the various searches, 616 citations were excluded as duplicates, 2877 were ineligible (Supplementary Table S1), and 85 systematic review

studies met the broad eligibility criteria (Supplementary Table S2). The extent of the systematic review/meta-analysis literature is graphically mapped in Supplementary Figure S2. The evidence of effectiveness across outcomes is not presented here (forthcoming in another article that includes other study designs and informs evidence-based decision-making). The purpose of this report is simply to describe where gaps are in the published, relevant literature.

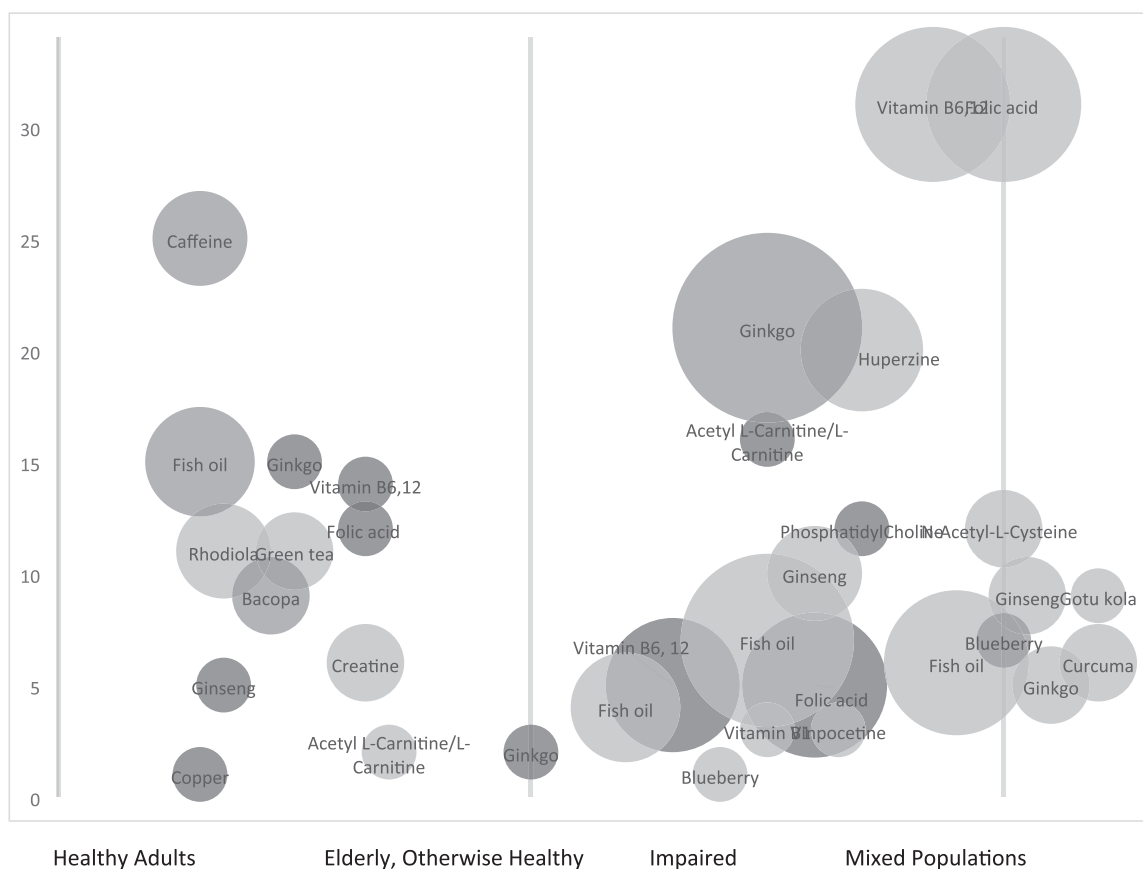

**SUPPLEMENTARY FIG. S2.** Evidence map of systematic reviews/meta-analyses. X-axis is the types of populations studied (left to right: healthy adults, elderly otherwise healthy, impaired, mixed populations). Y-axis: number of RCTs in largest systematic review/meta-analysis. Bubble size is the number of quality systematic reviews published to date. RCT, randomized controlled trials.

### Supplementary References

- S1. US Special Operations Command. Policy Memorandum number 16–29: Policy on Performance Enhancing Substance Use for Special Operations Forces. 2016.
- S2. Office of Dietary Supplements [homepage on the Internet]. Online document at: [www.ods.od.nih.gov](http://www.ods.od.nih.gov), accessed March 7, 2019.
- S3. Chen N, Yang M, Zhou M, et al. L-carnitine for cognitive enhancement in people without cognitive impairment. *Cochrane Database Syst Rev* 2017;2017:CD009374.
- S4. Hudson SA, Tabet N. Acetyl-L-carnitine for dementia. *Cochrane Database Syst Rev* 2003;2:CD003158. DOI: 10.1002/14651858.CD003158.
- S5. Kongkeaw C, Dilokthornsakul P, Thanarangsarit P, et al. Meta-analysis of randomized controlled trials on cognitive effects of *Bacopa monnieri* extract. *J Ethnopharmacol* 2014;151:528–535.
- S6. Pase MP, Kean J, Sarris J, et al. The cognitive-enhancing effects of *Bacopa monnieri*: A systematic review of randomized, controlled human clinical trials. *J Altern Complement Med* 2012;18:647–652.
- S7. Hein S, Whyte AR, Wood E, et al. Systematic review of the effects of blueberry on cognitive performance as we age. *J Gerontol A Biol Sci Med Sci* 2019;984–995.
- S8. Ko H, Hunter KE, Scott AM, et al. A systematic review of performance-enhancing pharmacologicals and biotechnologies in the army. *J R Army Med Corps* 2018;164:197–206.
- S9. Crawford C, Teo L, Lafferty L, et al. Caffeine to optimize cognitive function for military mission-readiness: A systematic review and recommendations for the field. *Nutr Rev* 2017;75(Suppl 2):17–35.
- S10. Liira J, Verbeek JH, Costa G, et al. Pharmacological interventions for sleepiness and sleep disturbances caused by shift work. *Cochrane Database Syst Rev* 2014;Cd009776.
- S11. Stares A, Bains M. The additive effects of creatine supplementation and exercise training in an aging population: A systematic review of randomized controlled trials. *J Geriatr Phys Ther* 2019. [Epub ahead of print]. DOI: 10.1519/JPT.0000000000000222.
- S12. Avgerinos KI, Spyrou N, Bougioukas KI, Kapogiannis D. Effects of creatine supplementation on cognitive function of healthy individuals: A systematic review of randomized controlled trials. *Exp Gerontol* 2018;108:166–173.
- S13. Zhu LN, Mei X, Zhang ZG, et al. Curcumin intervention for cognitive function in different types of people: A systematic review and meta-analysis. *Phytother Res* 2019;33:524–533.
- S14. Canhada S, Castro K, Perry IS, Luft VC. Omega-3 fatty acids' supplementation in Alzheimer's disease: A systematic review. *Nutr Neurosci* 2018;21:529–538.
- S15. Rangel-Huerta OD, Gil A. Effect of omega-3 fatty acids on cognition: An updated systematic review of randomized clinical trials. *Nutr Rev* 2018;76:1–20.
- S16. Araya-Quintanilla F, Gutierrez-Espinoza H, Sanchez-Montoya U, et al. Effectiveness of omega-3 fatty acid supplementation in patients with Alzheimer disease: A

- systematic review and meta-analysis. *Neurologia* 2017;pii: S0213-4853(17)30252-9.
- S17. Masana MF, Koyanagi A, Haro JM, Tyrovolas S. N-3 fatty acids, mediterranean diet and cognitive function in normal aging: A systematic review. *Exp Gerontol* 2017;91:39–50.
- S18. Teo L, Crawford C, Yehuda R, et al. Omega-3 polyunsaturated fatty acids to optimize cognitive function for military mission-readiness: A systematic review and recommendations for the field. *Nutr Rev* 2017;75(Suppl 2):36–48.
- S19. Burckhardt M, Herke M, Wustmann T, et al. Omega-3 fatty acids for the treatment of dementia. *Cochrane Database Syst Rev* 2016;4:CD009002.
- S20. de Souza Fernandes DP, Canaan Rezende FA, Pereira Rocha G, et al. Effect of eicosapentaenoic acid and docosahexaenoic acid supplementations to control cognitive decline in dementia and Alzheimer's disease: A systematic review. *Nutri Hosp* 2015;32:528–533.
- S21. Yurko-Mauro K, Alexander DD, Van Elswyk ME. Docosahexaenoic acid and adult memory: A systematic review and meta-analysis. *PLoS One* 2015;10:e0120391.
- S22. Jiao J, Li Q, Chu J, et al. Effect of n-3 PUFA supplementation on cognitive function throughout the life span from infancy to old age: A systematic review and meta-analysis of randomized controlled trials. *Am J Clin Nutr* 2014;100:1422–1436.
- S23. Mazereeuw G, Lanctot KL, Chau SA, et al. Effects of omega-3 fatty acids on cognitive performance: A meta-analysis. *Neurobiol Aging* 2012;33:1417–1429.
- S24. Sydenham E, Dangour AD, Lim WS. Omega 3 fatty acid for the prevention of cognitive decline and dementia. *Cochrane Database Syst Rev* 2012:CD005379.
- S25. Warner JP, Butler R, Gupta S. Dementia. *BMJ Clin Evid* 2010;2010:pii:1001.
- S26. Grimley Evans J, Malouf R, Huppert FAH, Van Niekerk JK. Dehydroepiandrosterone (DHEA) supplementation for cognitive function in healthy elderly people. *Cochrane Database Syst Rev* 2006;4:CD006221. DOI: 10.1002/14651858.CD006221.
- S27. Fotuhi M, Mohassel P, Yaffe K. Fish consumption, long-chain omega-3 fatty acids and risk of cognitive decline or alzheimer disease: A complex association. *Nat Clin Pract Neurol* 2009;5:140–152.
- S28. Issa AM, Mojica WA, Morton SC, et al. The efficacy of omega-3 fatty acids on cognitive function in aging and dementia: A systematic review. *Dement Geriatr Cogn Disord* 2006;21:88–96.
- S29. Ghorani-Azam A, Sepahi S, Khodaverdi E, Mohajeri SA. Herbal medicine as a promising therapeutic approach for the management of vascular dementia: A systematic literature review. *Phytother Res* 2018;32:1720–1728.
- S30. Yang Y, Ning Y, Shang W, et al. Association of peripheral arterial disease with all-cause and cardiovascular mortality in hemodialysis patients: A meta-analysis. *BMC Nephrol* 2016;17:195.
- S31. von Gunten A, Schlaefke S, Uberla K. Efficacy of Ginkgo biloba extract EGb 761(R) in dementia with behavioural and psychological symptoms: A systematic review. *World J Biol Psychiatry* 2016;17:622–633.
- S32. Strohle A, Schmidt DK, Schultz F, et al. Drug and exercise treatment of alzheimer disease and mild cognitive impairment: A systematic review and meta-analysis of effects on cognition in randomized controlled trials. *Am J Geriatr Psychiatry* 2015;23:1234–1249.
- S33. Tan MS, Yu JT, Tan CC, et al. Efficacy and adverse effects of ginkgo biloba for cognitive impairment and dementia: A systematic review and meta-analysis. *J Alzheimer's Dis* 2015;43:589–603.
- S34. Gauthier S, Schlaefke S. Efficacy and tolerability of ginkgo biloba extract EGb 761(R) in dementia: A systematic review and meta-analysis of randomized placebo-controlled trials. *Clin Interv Aging* 2014;9:2065–2077.
- S35. Jiang L, Su L, Cui H, et al. Ginkgo biloba extract for dementia: A systematic review. *Shanghai Arch Psychiatry* 2013;25:10–21.
- S36. Clement YN, Onakpoya I, Hung SK, Ernst E. Effects of herbal and dietary supplements on cognition in menopause: A systematic review. *Maturitas* 2011;68:256–263.
- S37. Canter PH, Ernst E. Ginkgo biloba is not a smart drug: An updated systematic review of randomised clinical trials testing the nootropic effects of G. biloba extracts in healthy people. *Hum Psychopharmacol* 2007;22:265–278.
- S38. Birks J, Grimley EV, Van Dongen M. Ginkgo biloba for cognitive impairment and dementia. *Cochrane Database Syst Rev* 2002:CD003120.
- S39. Arring NM, Millstine D, Marks LA, Nail LM. Ginseng as a treatment for fatigue: A systematic review. *J Altern Complement Med* 2018;24:624–633.
- S40. Choi J, Kim TH, Choi TY, Lee MS. Ginseng for health care: A systematic review of randomized controlled trials in korean literature. *PLoS One* 2013;8:e59978.
- S41. Geng J, Dong J, Ni H, et al. Ginseng for cognition. *Cochrane Database Syst Rev* 2010:CD007769.
- S42. Lee MS, Yang EJ, Kim JI, Ernst E. Ginseng for cognitive function in Alzheimer's disease: A systematic review. *J Alzheimers Dis* 2009;18:339–344.
- S43. Vogler BK, Pittler MH, Ernst E. The efficacy of ginseng: A systematic review of randomised clinical trials. *Eur J Clin Pharmacol* 1999;55:567–575.
- S44. Hyde AJ, May BH, Dong L, et al. Herbal medicine for management of the behavioural and psychological symptoms of dementia (BPSD): A systematic review and meta-analysis. *J Psychopharmacol* 2017;31:169–183.
- S45. Puttarak P, Dilokthornsakul P, Saokaew S, et al. Effects of centella asiatica (L.) urb. on cognitive function and mood related outcomes: A systematic review and meta-analysis. *Sci Rep* 2017;7:10646.
- S46. Mancini E, Beglinger C, Drewe J, et al. Green tea effects on cognition, mood and human brain function: A systematic review. *Phytomedicine* 2017;34:26–37.
- S47. Camfield DA, Stough C, Farrimond J, Scholey AB. Acute effects of tea constituents L-theanine, caffeine, and epigallocatechin gallate on cognitive function and mood: A systematic review and meta-analysis. *Nutr Rev* 2014;72:507–522.
- S48. Liang J, Li J, Jia R, et al. Identification of the optimal cognitive drugs among Alzheimer's disease: A Bayesian meta-analytic review. *Clin Interv Aging* 2018;13:2061–2073.
- S49. Hao Z, Liu M, Liu Z, Lu D. Huperzine A for vascular dementia. *Cochrane Database Syst Rev* 2009;2:CD007365. DOI: 10.1002/14651858.CD007365.pub2.
- S50. Hao Z, Liu M, Liu Z, Lu D. Huperzine A for vascular dementia. *Cochrane Database Syst Rev* 2011.
- S51. Wang BS, Wang H, Wei ZH, et al. Efficacy and safety of natural acetylcholinesterase inhibitor huperzine A in the treatment of Alzheimer's disease: An updated meta-analysis. *J Neural Transm* 2009;116:457–465.
- S52. Houston BL, Hurrie D, Graham J, et al. Efficacy of iron supplementation on fatigue and physical capacity in non-anaemic iron-deficient adults: A systematic review of randomised controlled trials. *BMJ Open* 2018;8:E019240.

- S53. Low MS, Speedy J, Styles CE, et al. Daily iron supplementation for improving anaemia, iron status and health in menstruating women. *Cochrane Database Syst Rev* 2016; 4:CD009747.
- S54. Lomagno KA, Hu F, Riddell LJ, et al. Increasing iron and zinc in pre-menopausal women and its effects on mood and cognition: A systematic review. *Nutrients* 2014;6:5117–5141.
- S55. Falkingham M, Abdelhamid A, Curtis P, et al. The effects of oral iron supplementation on cognition in older children and adults: A systematic review and meta-analysis. *Nutr J* 2010;9:4.
- S56. Lyons M, Blackshaw W. Does magnesium sulfate have a role in the management of severe traumatic brain injury in civilian and military populations? A systematic review and meta-analysis. *J R Army Med Corps* 2018;164:442–449.
- S57. Skvarc DR, Dean OM, Byrne LK, et al. The effect of N-acetylcysteine (NAC) on human cognition—A systematic review. *Neurosci Biobehav Rev* 2017;78:44–56.
- S58. Deepmala, Slattery J, Kumar N, et al. Clinical trials of N-acetylcysteine in psychiatry and neurology: A systematic review. *Neurosci Biobehav Rev* 2015;55:294–321.
- S59. Higgins PTJ, Flicker L. Lecithin for dementia and cognitive impairment. *Cochrane Database Syst Rev* 2009.
- S60. Ishaque S, Shamseer L, Bukutu C, Vohra S. *Rhodiola rosea* for physical and mental fatigue: A systematic review. *BMC Complement Altern Med* 2012;12:70.
- S61. Hung SK, Perry R, Ernst E. The effectiveness and efficacy of *Rhodiola rosea* L.: A systematic review of randomized clinical trials. *Phytomedicine* 2011;18:235–244.
- S62. Baker B. Military effectiveness of five dietary supplements purported to aid cognitive and physical performance. *J Mil Veterans Health* 2017;25.
- S63. Szatmári S, Bereczki D. Procaine treatments for cognition and dementia. *Cochrane Database Syst Rev* 2008;4:CD005993. DOI: 10.1002/14651858.CD005993.pub2.
- S64. Rodríguez JL, Qizilbash N, López-Arrieta J. Thiamine for Alzheimer’s disease. *Cochrane Database of Syst Rev* 2001;2:CD001498. DOI: 10.1002/14651858.CD001498.
- S65. Malouf R, Grimley Evans J. Vitamin B6 for cognition. *Cochrane Database of Syst Rev* 2003;4:CD004393. DOI: 10.1002/14651858.CD004393.
- S66. Malouf R, Areosa Sastre A. Vitamin B12 for cognition. *Cochrane Database of Syst Rev* 2003;3:CD004394. DOI: 10.1002/14651858.CD004394.
- S67. Ford AH, Almeida OP. Effect of vitamin B supplementation on cognitive function in the elderly: A systematic review and meta-analysis. *Drugs Aging* 2019;36:419–434.
- S68. Zhang DM, Ye JX, Mu JS, Cui XP. Efficacy of vitamin B supplementation on cognition in elderly patients with cognitive-related diseases. *J Geriatr Psychiatry Neurol* 2017;30:50–59.
- S69. Li MM, Yu JT, Wang HF, et al. Efficacy of vitamins B supplementation on mild cognitive impairment and Alzheimer’s disease: A systematic review and meta-analysis. *Curr Alzheimer Res* 2014;11:844–852.
- S70. Ford AH, Almeida OP. Effect of homocysteine lowering treatment on cognitive function: A systematic review and meta-analysis of randomized controlled trials. *J Alzheimers Dis* 2012;29:133–149.
- S71. Dangour AD, Whitehouse PJ, Rafferty K, et al. B-vitamins and fatty acids in the prevention and treatment of Alzheimer’s disease and dementia: A systematic review. *J Alzheimers Dis* 2010;22:205–224.
- S72. Malouf M, Grimley EJ, Areosa SA. Folic acid with or without vitamin B12 for cognition and dementia. *Cochrane Database Syst Rev* 2003:CD004514.
- S73. Balk EM, Raman G, Tatsioni A, et al. Vitamin B6, B12, and folic acid supplementation and cognitive function: A systematic review of randomized trials. *Arch Intern Med* 2007;167:21–30.
- S74. Ruxton CH, Derbyshire E, Toribio-Mateas M. Role of fatty acids and micronutrients in healthy ageing: A systematic review of randomised controlled trials set in the context of european dietary surveys of older adults. *J Hum Nutr Diet* 2016;29:308–324.
- S75. McCleery J, Abraham RP, Denton DA, et al. Vitamin and mineral supplementation for preventing dementia or delaying cognitive decline in people with mild cognitive impairment. *Cochrane Database Syst Rev* 2018;11:CD011905.
- S76. Rutjes AW, Denton DA, Di Nisio M, et al. Vitamin and mineral supplementation for maintaining cognitive function in cognitively healthy people in mid and late life. *Cochrane Database Syst Rev* 2018;12:CD011906.
- S77. Goodwill AM, Szoeki C. A systematic review and meta-analysis of the effect of low vitamin D on cognition. *J Am Geriatr Soc* 2017;65:2161–2168.
- S78. Farina N, Llewellyn D, Isaac MGEKN, Tabet N. Vitamin E for Alzheimer’s dementia and mild cognitive impairment. *Cochrane Database of Systematic Review* 2017;4:CD002854. DOI: 10.1002/14651858.CD002854.pub5.
- S79. Warthon-Medina M, Moran VH, Stammers AL, et al. Zinc intake, status and indices of cognitive function in adults and children: A systematic review and meta-analysis. *Eur J Clin Nutr* 2015;69:649–661.
- S80. D’Cunha NM, Georgousopoulou EN, Dadigamwage L, et al. Effect of long-term nutraceutical and dietary supplement use on cognition in the elderly: A 10-year systematic review of randomised controlled trials. *Br J Nutr* 2018;119:280–298.
- S81. Butler M, Nelson VA, Davila H, et al. Over-the-counter supplement interventions to prevent cognitive decline, mild cognitive impairment, and clinical alzheimer-type dementia: A systematic review. *Ann Intern Med* 2018;168:52–62.
- S82. McGrattan AM, McEvoy CT, McGuinness B, et al. Effect of dietary interventions in mild cognitive impairment: A systematic review. *Br J Nutr* 2018;120:1388–1405.
- S83. Solfrizzi V, Agosti P, Lozupone M, et al. Nutritional interventions and cognitive-related outcomes in patients with late-life cognitive disorders: A systematic review. *Neurosci Biobehav Rev* 2018;95:480–498.
- S84. Fernández-Cao JC, Aranda N, Ribot B, et al. Elevated iron status and risk of gestational diabetes mellitus: A systematic review and meta-analysis. *Matern Child Nutr* 2017 Oct;13:e12400.
- S85. Forbes SC, Holroyd-Leduc JM, Poulin MJ, Hogan DB. Effect of nutrients, dietary supplements and vitamins on cognition: A systematic review and meta-analysis of randomized controlled trials. *Can Geriatr J* 2015;18:231–245.
- S86. Yang M, Xu DD, Zhang Y, et al. A systematic review on natural medicines for the prevention and treatment of Alzheimer’s disease with meta-analyses of intervention effect of ginkgo. *Am J Chin Med* 2014;42:505–521.
- S87. Cooper C, Li R, Lyketsos C, Livingston G. Treatment for mild cognitive impairment: Systematic review. *Br J Psychiatry* 2013;203:255–264.

SUPPLEMENTARY DATA S2. PRODUCT SELECTION FLOW CHART

| Database searched <sup>a</sup>    | Search strategy                                                                   | No. of products retrieved               | Total unique products |
|-----------------------------------|-----------------------------------------------------------------------------------|-----------------------------------------|-----------------------|
| Dietary Supplement Label Database | Advanced search: label claims must include “brain” and must include “performance” | 170                                     | 468                   |
|                                   | Advanced search: products with “cognitive function” in claims                     | 250                                     |                       |
| GNC website<br>Natural medicines  | Advanced search: product names with “brain”                                       | 183                                     | 12                    |
|                                   | Dietary supplements to support “brain and memory health”                          | 21                                      |                       |
| Amazon.com<br>Shopmyexchange.com  | Commercial products: “brain”                                                      | 261                                     | 170                   |
|                                   | Herbs, foods, and supplements: people use this for: “cognitive”                   |                                         |                       |
|                                   | Herbs, foods, and supplements: people use this for: “brain”                       | 14                                      |                       |
|                                   | Supplement and brain                                                              | Used as cross-check with above searches |                       |
|                                   | Supplement and cognitive                                                          |                                         |                       |

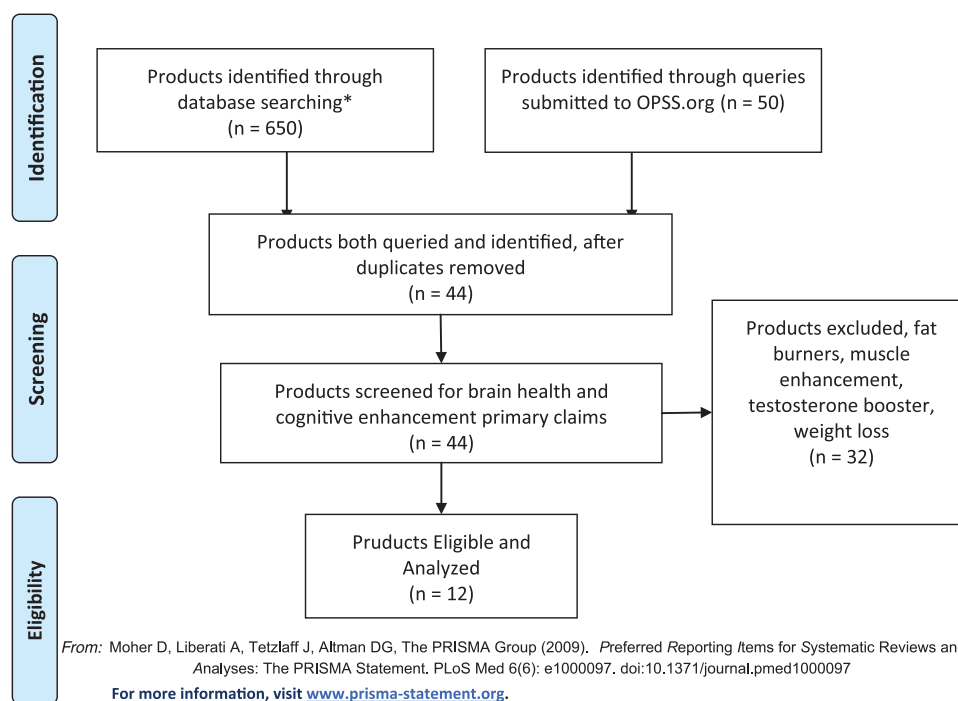

**Supplementary Data S3. Instrumentation and Analytic Conditions**

*Liquid chromatography-quadrupole time-of-flight mass spectrometry*

The liquid chromatographic system was an Agilent Series 1290 comprising the following modular components: binary pump, an autosampler with 100-well tray, and a thermostatically controlled column compartment. Separation was achieved on an Agilent Poroshell 120 EC C18 (2.1 × 150 mm, 2.7 μ) column at a flow rate of 0.2 mL/min. The mobile phase consisted of water with 0.1% formic acid (A) and acetonitrile with 0.1% formic acid (B) using the following gradient elution: 0 min, 99% A: 1% B, isocratic for next 3 min, then for

next 27 min 55% A:45% B, then to 100% B in next 20 min. Each run was followed by a 3-min wash with 100% B and an equilibration period of 5 min with 99% A/1% B. Two microliters of sample was injected and column temperature was maintained at 35°C. The mass spectrometric analysis was performed with a quadrupole time-of-flight-Mass Spectrometry (Model no. G6530A; Agilent Technologies, Palo Alto, CA) equipped with an electrospray ionization source with Jet Stream technology using the following parameters: drying gas (N<sub>2</sub>) flow rate, 7.0 L/min; drying gas temperature, 300°C; nebulizer, 25 psig, sheath gas temperature, 300°C; sheath gas flow, 7 L/min; capillary, 3500 V; skimmer, 65 V; fragmentor voltage, 100 V. The sample collision energy was set at 35 eV. All the operations, acquisition, and analysis of data were

controlled by Agilent MassHunter Acquisition software ver. A.05.00 and processed with MassHunter Qualitative Analysis software ver. B.08.00. Each sample was analyzed in both positive and negative modes in the range of  $m/z = 50-2500$ . Accurate mass measurements were obtained by means of ion correction techniques using reference masses at  $m/z$  121.0509 (protonated purine) and 922.0098 [protonated hexakis (1H, 1H, 3H-tetrafluoropropoxy) phosphazine or HP-921] in positive ion mode, while at  $m/z$  112.9856

(deprotonated trifluoroacetic acid-[TFA]) and 1033.9881 (TFA adducted HP-921) were used in negative ion mode. The compounds were confirmed in each spectrum using accurate mass. For this purpose, the reference solution was introduced into the ESI source via a T-junction using an Agilent Series 1200 isocratic pump (Agilent Technologies, Santa Clara, CA) using a 100:1 splitter set at a flow rate of 20  $\mu\text{L}/\text{min}$ . Only single tests were run for each of the select products.
